# Supplementary material for: DeCoSTAR: Reconstructing the Ancestral Organization of Genes or Genomes Using Reconciled Phylogenies
Source: Oxford University Press journal article supplement (doi:10.1093/gbe/evx069), 2017-04-07
Supplement: evx069_Supp.zip [file evx069_Supp.zip]

Archive with 3 entries (3 files):
- algorithm.sty
- ouparticle.cls
- Supplementary_file.pdf
